# Supplementary material
Source: PubMed Central journal article supplement (PMC5074846)
Supplement: NIHMS822033-supplement-2.pdf [file NIHMS822033-supplement-2.pdf]

## SUPPLEMENTARY MATERIAL

### Detailed Methods

#### *Preparation of Tissue Culture Molds and Frames*

A custom negative mold designed to produce two troughs (2 mm diameter x 7 mm length) was machined from Teflon (Figure S1). Degassed PDMS was poured over the negative molds and cured at 80 °C for  $\geq 4$  hours to create re-usable tissue molds. Tissue molds were sterilized, coated for  $\geq 1$  hour in 0.2% (w/v) pluronic F-127, and rinsed once with water immediately prior to each use. Frames were laser-cut from spunbound nylon sheets (Cerex Advanced Fabrics), sterilized by soaking in 70% ethanol, and allowed to dry for  $\geq 1$  hour prior to use.

#### *Neonatal Rat Ventricular Myocyte Isolation*

NRVMs were isolated from 2-day-old Sprague Dawley rats as previously described [1]. Ventricles were excised and minced into 10-15 pieces in ice-cold digestion buffer (HBSS with 1.2 mM  $MgCl_2$ ). After 6 washes in ice-cold buffer, minced hearts were transferred to buffer containing 1 mg/mL trypsin (US Biological) and incubated overnight (16-18 hours) at 4 °C with gentle agitation. Minced hearts were washed once in ice-cold buffer, then pre-digested in buffer containing 250 U/mL Collagenase Type 2 (Worthington) for 1 minute (37 °C, orbital rotation @ 90 rpm). After discarding cells from the pre-digest, 4 serial digestions in 250 U/mL Collagenase were applied to complete the cell dissociation (3-4 minutes each, 37 °C, 90 rpm). Cells from each digest were collected in ice-cold buffer, centrifuged, resuspended in buffer, and passed through 100  $\mu m$  filter. Filtered cells were centrifuged again and resuspended in 37 °C pre-plate media (formulation in Table S1). Cell suspension was pre-plated on a non-coated tissue culture flask for 45 minutes to enrich the fraction of cardiomyocytes in the cell suspension. Non-adherent cells were collected, counted, and used for cardiobundle construction. Typical yield from 1 litter of 10 neonates was 50-55 x 10<sup>6</sup> cells.

#### *NRVM Cardiobundle Fabrication and Culture*

The complete hydrogel formulation is listed in Table S2. Pre-plated cell suspension was centrifuged and resuspended to a concentration of 20.8 x 10<sup>6</sup> cells/mL in 3D NRVM Media (media formulation in Table S1). To prepare the gels, cell suspension was added to pre-mixed fibrinogen + Matrigel®. Thrombin was mixed with the 2x cardiac medium, and the 2x medium + thrombin solution was added to complete the gel mixture. Complete gel was mixed and quickly pipetted into tissue molds with frames (70  $\mu L$  per mold). The gel was incubated for 45 minutes at 37 °C to allow polymerization and attachment to the frame, then submerged in 3D cardiac medium (1 mold per well of a 12 well plate). The next day, frames with gels attached were carefully removed from the molds by grasping the frame with fine-tip forceps. Full media changes of 1.5 mL per well were completed every other day. Cardiobundles were cultured at 37 °C on a static (non-moving) platform or a dynamic (rocking) platform ( $\pm 30$  degree tilt, 0.4 Hz) for a period of 14 days. For certain experiments, cardiobundles were switched from static to dynamic culture and vice versa on day 7, and cultured for an additional 7 days (Figure S10). Protein isolation for western blot analysis of kinase phosphorylation was conducted 24 hours after the switch. In selected studies, rapamycin (500 nM), phenylephrine (20  $\mu M$ ), gadolinium (20  $\mu M$ ), or streptomycin (50  $\mu M$ ) were added to culture medium on day 7 and replenished with each media change.

#### *hPSC-CM Differentiation*

All studies were carried out with H9 hESCs (WiCell), HES2 hESCs (differentiated to CMs by Vistagen Therapeutics) or a normal iPSC line (gift from Thomas Ribar, Duke iPSC Core Facility). Undifferentiated

hPSCs were maintained in either TeSR-E8 or mTeSR-1 medium as previously described [2, 3]. Cardiac differentiation was carried out using two different protocols, both of which utilized small molecule Wnt agonists and inhibitors [4, 5]. For the Palecek protocol, hPSCs were cultured in RPMI 1640 medium containing B27 (minus insulin) supplement for 7 days, including CHIR (10-14  $\mu$ M) from day 0-1 and IWP2 (5  $\mu$ M) from day 3-5. Cells were cultured in RPMI 1640 medium containing B27 supplement beyond day 7. For S. Wu lab (JOVE) protocol, hPSCs were cultured in RPMI 1640 medium containing B27 (minus insulin) supplement for 8 days with daily media changes, including CHIR (6  $\mu$ M) from day 0-2 and IWR1 (5  $\mu$ M) from day 4-6. Cells were cultured in RPMI 1640 medium containing B27 supplement beyond day 8. In some studies, metabolic selection using no glucose CDM3 medium was carried out from day 10-12 [6, 7]. CDM3 medium consists of RPMI 1640 medium (lacking glucose) supplemented with 0.5 mg/ml recombinant human serum albumin and 213 $\mu$ g/ml L-ascorbic acid 2-phosphate sesquimagnesium salt hydrate [7]. In a small subset of experiments, the J. Wu lab protocol (CDM3)[7] for differentiation was used. In addition, commercially available, HES2-derived CMs were provided by Vistagen Therapeutics for a small study. For all experiments, hPSC-CM cardiobundles were constructed between day 12 and 22 of culture with cells that were 83 $\pm$ 3.7% positive for cardiac troponin T.

### ***hPSC-CM Cardiobundle Culture***

hPSC-CM cardiobundles were constructed similarly to NRVM cardiobundles. hPSC-CM were dissociated with 0.25% trypsin and resuspended in fibrin-based hydrogel according to Table S2. Complete gel mix was pipetted into PDMS molds with nylon frames and polymerized at 37  $^{\circ}$ C. Cardiobundles were removed from molds 1-2 days after fabrication and cultured free-floating on a rocker or static platform. Cardiobundles were cultured in 3DRB+ medium for 7 days, then 5% FBS DMEM medium for 14 days prior to functional testing and immunostaining (for culture media formulations, see Table S5). In a portion of experiments, cardiobundles were switched between static and dynamic culture after 7 days in 5% FBS medium.

### ***Immunostaining and Image Analysis***

Cardiobundles were fixed in 2% paraformaldehyde (PFA) overnight at 4  $^{\circ}$ C. Fixed cardiobundles were cut in half, and one half of the cardiobundle was incubated for 20-25 minutes in optimal cutting temperature (OCT) medium then frozen. Ten  $\mu$ m cross sections were cut using a cryostat microtome. Intact and sectioned samples were permeabilized with Triton-X for 30 minutes at room temperature (0.5 % v/v Triton-X for intact samples, 0.1 % for sectioned samples). Blocking solution consisting of 1% bovine serum albumin (BSA) and 10% chick serum in PBS was applied at 4  $^{\circ}$ C (24 hours for intact samples, 4 hours for sectioned samples). Primary antibodies (listed in Table S3) were diluted in blocking solution and applied overnight at 4  $^{\circ}$ C, followed by secondary antibodies at room temperature for 2 hours. Samples were imaged using a Zeiss 510 inverted confocal microscope. Image analysis of cross-sections was performed using custom ImageJ programs. F-actin<sup>+</sup> area was determined by subtracting background from the F-actin channel and applying Li's minimum cross entropy threshold. Total area was determined by applying Li's threshold to the merged (F-actin, Vimentin, DAPI) image, processing with the built-in "Fill Holes" function, and using the wand tool to select the entire area within the cross-section's outer boundary. Nuclei were counted by previously described methods [8]. F-actin<sup>+</sup> nuclei numbers were determined by counting the nuclei within the region of interest (ROI) defined by thresholding the F-actin channel.

### ***DNA Content Assay***

Total DNA content in cardiobundles was quantified using Hoechst assay[9] in order to estimate cardiobundle cell number. Specifically, single cardiobundles were digested using animal tissue lysis

buffer (ATL) and proteinase K from Qiagen DNeasy Blood & Tissue Kit for 3-4 hours at 56 °C in a working volume of 100  $\mu$ L. Lysed sample was first diluted 1:1 with ATL buffer, then mixed 1:1 with Hoechst 33258 solution (Thermo, 0.2  $\mu$ g/mL in Tris-buffered saline with 1 mM EDTA). Two replicates of each sample were read on a 96-well fluorescent microplate reader (Ex/Em of 350/460). Cell number in cardiobundle was derived using standard curve that related measured DNA content and known cell number in serial dilutions of lysed cells used for making cardiobundles.

### ***Western Blot***

To isolate protein, 3-4 cardiobundles were pooled together and minced in ice-cold RIPA buffer with protease inhibitor (Sigma), agitated intermittently for 2-3 hours, and centrifuged at 15000g for 30 minutes to remove insoluble matter. Protein concentration was measured using BCA assay (Pierce). 15  $\mu$ g of protein sample were run in each lane of a 4%-15% gradient polyacrylamide gel and transferred to nitrocellulose membrane. The membrane was blocked in TBS with 0.1% Tween 20 and 5% milk, carefully cut at the appropriate molecular weight markers, and probed for antibodies listed in Table S3 (4 °C, overnight). Per manufacturer instructions, blocking solution for phosphorylated and total mTOR, S6K, AMPK, Akt, and ERK1/2 contained 5% (w/v) BSA instead of 5% milk. HRP-conjugated secondary antibodies were applied for 1 hour at room temperature. Chemiluminescence was imaged using a Bio-Rad ChemiDoc system, and protein bands were quantified by densitometry in ImageJ.

### ***qPCR***

Total RNA was isolated according to instructions of RNeasy fibrous tissue kit (Qiagen). The RNA of 2 cardiobundles was pooled together, and concentration was measured using a Nanodrop 1000. Reverse transcription was run on equal amounts of RNA using iScript cDNA Synthesis kit (BioRad). qPCR was performed using iTaq Universal SYBR Green Supermix kit (BioRad). Relative expression of indicated genes was quantified by the  $\Delta\Delta$ CT method, using  $\beta$ -2 microglobulin (B2M) as the housekeeping gene. Primers sequences are listed in Table S4.

### ***Optical Mapping***

Action potential propagation was measured by optical mapping, similar to previously described methods [10, 11]. Live cardiobundles were stained with the potentiometric membrane dye di-4 ANEPPS (10  $\mu$ M, 5 minutes, room temperature). Stained cardiobundles were immersed in 37 °C Tyrode's solution with 10  $\mu$ M blebbistatin to inhibit contractions, and imaged with a 4x microscope objective. Action potentials were initiated by a platinum point stimulus electrode at the position where one end of the cardiobundle is connected to the frame. After 10 s of pre-pacing, signals were recorded with a photo diode array (channel diameter 750  $\mu$ m, magnified channel diameter 187.5  $\mu$ m) at a sampling rate of 2.4 kHz. Activation times of individual channels were calculated as the time of maximum voltage upstroke, and average conduction velocity (CV) was calculated by a linear fit of distance vs activation time (Figure S8). Action potential duration was calculated as the difference between activation time and 80% repolarization. For NRVM cardiobundles, pacing rate was increased from a basal rate of 2 Hz in increments of 1 Hz, with maximum capture rate recorded as highest rate at which each stimulus elicited an action potential for a duration of 2 s (after 10 s of pre-pacing). For hPSC-CM cardiobundles, pacing began at 1 Hz and increased in 0.5 Hz increments.

### ***Isometric Force Testing***

Contractile force was measured using a custom force measurement apparatus under field stimulation, using a previously described custom system [11, 12]. Cardiobundle pairs were separated into single cardiobundles and immersed in 37 °C Tyrode's solution with 1.8 mM CaCl<sub>2</sub>. One end of the cardiobundle

frame was pinned to a fixed PDMS block, and the other end was pinned to a PDMS block connected to a force transducer. With the bundle held at culture length, the frame edges parallel to the cardiobundle were cut, and contractions elicited by field stimulus from platinum electrodes. Rat cardiobundles were paced at a basal rate of 2 Hz (1.5 Hz for human cardiobundles), with 10 s of pre-pacing applied during constant mixing of the Tyrode's bath. After pre-pacing, 2 s of data were recorded and analyzed for active twitch force using a custom MATLAB program. Total twitch duration was measured by defining the beginning and end of a contraction at 10% of peak amplitude; rise time and decay time were measured from 10% - 90% amplitude and from 90% - 10% amplitude, respectively. Cardiobundles were stretched in increments of 4% elongation, with recordings taken at each length until maximum active force was achieved (typically 4% or 8% elongation). For studies of passive tension, cardiobundles were stretched to 12% elongation.

### ***Calcium Imaging***

For NRVM, calcium imaging was performed in cardiobundles transduced with the genetically encoded calcium indicator GCaMP6 under the control of MHCK7 promoter [13] at the time of cardiobundle construction. For hPSC-CM, cardiobundles were loaded with Rhod-2 AM (according to manufacturer instructions) immediately prior to calcium imaging. After 2 weeks of culture, cardiobundles were paced at 1 Hz by field electrodes in 37 °C Tyrode's solution and imaged with a high speed EMCCD camera (Andor iXon 897 Ultra). Calcium amplitude was measured by normalizing the change in fluorescence during calcium transients to the baseline fluorescence ( $\Delta F/F$  method[14]).

## **Legends for Video Files**

### **Supplemental Video 1**

Rocking platform was used for dynamic culture of cardiobundles in 12-well tissue culture plates. The plates on the incubator shelf were used for static culture.

### **Supplemental Video 2**

Spontaneous contractions of day 7 NRVM cardiobundles cultured in static or dynamic conditions. The cardiobundles are anchored to a 1-mm wide nylon frame.

### **Supplemental Video 3**

Action potential propagation in 2-week, dynamically cultured NRVM cardiobundle visualized by optical mapping using di-4-ANEPPS. Point stimulus is applied to the cardiobundle at the bottom of the field of view, at rates of 2, 4, and 8 Hz. The length of cardiobundle shown is 4 mm.

### **Supplemental Video 4**

Action potential propagation in 2-week, dynamically cultured hPSC-CM cardiobundle visualized by optical mapping using di-4-ANEPPS. Point stimulus is applied to the cardiobundle at the bottom of the field of view, at rates of 1 and 2 Hz. The length of cardiobundle shown is 4 mm.

### **Supplemental Video 5**

NRVM cardiobundles cultured dynamically for 2 weeks exhibit macroscopic contractions in response to electric field stimulus at a rate of 1 Hz. Four (4) pairs of cardiobundles are displayed, with each pair anchored within a porous nylon frame. Outer frame dimensions are 10 x 10 mm.

## Supplemental Tables

**Table S1: Culture media for rat cardiomyocytes.**

|                    | <b>NRVM Pre-plate media</b>  | <b>3D NRVM media</b>                                 | <b>2x cardiac media</b>                                    |
|--------------------|------------------------------|------------------------------------------------------|------------------------------------------------------------|
| <b>Basal media</b> | DMEM / F12<br>(Thermo 11330) | Low glucose DMEM<br>(Thermo 11885 or<br>Sigma D6046) | 2x concentrated<br>low glucose DMEM<br>(Thermo 31600-034)* |
| <b>FBS</b>         | 10%                          | --                                                   | --                                                         |
| <b>HS</b>          | 10%                          | 10 %                                                 | 20%                                                        |
| <b>ACA</b>         | --                           | 1 mg/mL                                              | 2 mg/mL                                                    |
| <b>AA 2-P SSH</b>  | --                           | 50 µg/mL                                             | --                                                         |
| <b>CEE</b>         | --                           | 1 %                                                  | --                                                         |
| <b>Penicillin</b>  | 5 U/mL                       | 5 U/mL                                               | 10 U/mL                                                    |
| <b>Vitamin B12</b> | 2 µg/mL                      | 2 µg/mL                                              | 4 µg/mL                                                    |

FBS: Fetal Bovine Serum

HS: Horse Serum

ACA: Aminocaproic Acid

AA 2-P SSH: Ascorbic Acid 2-phosphate sesquimagnesium salt hydrate

CEE: Chick embryo extract

\* prepared following supplier instructions, but with half of the recommended final volume (i.e., 1 packet into 500 mL instead of 1000 mL)

**Table S2: Formulation of hydrogel.**

| <b>Component</b>        | <b>Starting Concentration</b> | <b>Final Concentration in Gel</b> | <b>% of Final Gel Volume</b> | <b>Volume for 450 <math>\mu</math>L (6 cardiobundle pairs)</b> |
|-------------------------|-------------------------------|-----------------------------------|------------------------------|----------------------------------------------------------------|
| <b>Cell Suspension</b>  | 20.8 x 10 <sup>6</sup> per mL | 10 x 10 <sup>6</sup> per mL       | 48 %                         | 216 $\mu$ L                                                    |
| <b>Fibrinogen</b>       | 10 mg/mL                      | 2 mg/mL                           | 20 %                         | 90 $\mu$ L                                                     |
| <b>Matrigel</b>         | --                            | 10 % (v/v)                        | 10 %                         | 45 $\mu$ L                                                     |
| <b>2x cardiac media</b> | --                            | --                                | 20 %                         | 90 $\mu$ L                                                     |
| <b>Thrombin</b>         | 50 U/mL                       | 1 U/mL                            | 2 %                          | 9 $\mu$ L                                                      |

**Table S3: List of primary antibodies.**

| <b>Antigen</b>                     | <b>Supplier</b>           | <b>Cat. #</b> | <b>Application</b> | <b>Dilution</b> |
|------------------------------------|---------------------------|---------------|--------------------|-----------------|
| Sarcomeric $\alpha$ -actinin (SAA) | Sigma                     | A7811         | IF<br>WB           | 1:200<br>1:1000 |
| Cardiac Troponin T (cTnT)          | Abcam                     | Ab45932       | WB                 | 1:1000          |
| Connexin 43 (Cx43)                 | Abcam                     | Ab11370       | IF                 | 1:200           |
| N-cadherin (Ncad)                  | Abcam                     | Ab12221       | IF                 | 1:400           |
| $\alpha$ Myosin Heavy Chain (Myh6) | Santa Cruz                | SC-32732      | WB                 | 1:200           |
| Vimentin (Vim)                     | Abcam                     | Ab89996       | IF                 | 1:500           |
| Collagen 1 (Col 1)                 | Abcam                     | Ab34710       | IF                 | 1:400           |
| Caveolin 3 (Cav3)                  | Abcam                     | Ab2912        | IF                 | 1:200           |
| Lamin B1                           | Abcam                     | Ab16048       | WB                 | 1:2000          |
| GAPDH                              | Santa Cruz                | SC-32233      | WB                 | 1:1000          |
| Phospho-mTOR (Ser2448)             | Cell Signaling Technology | 5536          | WB                 | 1:2000          |
| Total mTOR                         | Cell Signaling Technology | 2983          | WB                 | 1:2000          |
| Phospho-S6K (Thr389)               | Cell Signaling Technology | 9205          | WB                 | 1:1000          |
| Total S6K                          | Cell Signaling Technology | 9202          | WB                 | 1:1000          |
| Phospho-Akt (Ser473)               | Cell Signaling Technology | 4060          | WB                 | 1:2000          |

| <b>Antigen</b>                    | <b>Supplier</b>              | <b>Cat. #</b> | <b>Application</b> | <b>Dilution</b> |
|-----------------------------------|------------------------------|---------------|--------------------|-----------------|
| Total Akt                         | Cell Signaling<br>Technology | 4691          | WB                 | 1:2000          |
| Phospho-AMPK<br>(Thr172)          | Cell Signaling<br>Technology | 2535          | WB                 | 1:1000          |
| Total AMPK                        | Cell Signaling<br>Technology | 5832          | WB                 | 1:1000          |
| Phospho-ERK1/2<br>(Thr202/Tyr204) | Cell Signaling<br>Technology | 9101          | WB                 | 1:1000          |
| Total ERK1/2                      | Cell Signaling<br>Technology | 4695          | WB                 | 1:1000          |

IF: Immunofluorescence  
WB: Western Blot



**Table S4: List of qPCR primers.**

| <b>Gene</b> | <b>Description</b>                                     | <b>Forward Primer</b>    | <b>Reverse Primer</b>    |
|-------------|--------------------------------------------------------|--------------------------|--------------------------|
| Atp2a2      | SERCA-2a                                               | TGTGCTCTGTGTAATGACTCTG   | CTCCGTGTCGAATACATTCATCT  |
| Cacna1c     | L-type Ca Channel (Ca <sub>v</sub> 1.2)                | ACTTCATCATCCTCTTCATCTGTG | CCAGCTTCTTTCTCTCCTTCTC   |
| Myh6        | Myosin heavy chain, $\alpha$                           | CAGAAGAAACTGAAGGAAAACCAG | TCTAGCCTCTCACTGATCTCC    |
| Myh7        | Myosin heavy chain, $\beta$                            | TATCAGTACATGCTGACAGATCG  | CTCTGGTGTTGACGGTCTTAC    |
| Gja1        | Gap junction protein $\alpha$ -1 (Connexin 43)         | GAGCTGTCGATTATGGAGGA     | AGGTTCAAGTTGGGGGATG      |
| Scn5a       | V <sub>m</sub> -gated Na channel (Na <sub>v</sub> 1.5) | CGTAACTTCACCGAGCTCAA     | CCCACATAGTAACACATCCGT    |
| B2M         | $\beta$ -2 Microglobulin                               | GCTTGCAGAGTTAAACACGTC    | CCAGATGATTCAGAGCTCCAT    |
| Acta1       | $\alpha$ -skeletal Actin                               | CTCTCTCTCCTCAGGACGACAATC | CAGAATGGCTGGCTTTAATGCTTC |
| Nppa        | Atrial natriuretic peptide (ANP)                       | GCGAGCAGACCGATGAA        | CCCGAGAGCACCTCCA         |
| Phd2        | Prolyl hydroxylase domain 2                            | CTGGGACGCCAAGGTGA        | CAATGTCAGCAAAGTGG        |
| Phd3        | Prolyl hydroxylase domain 3                            | GTTCAAGCCCTCCTATGC       | ACCACCGTCAGTCTTTA        |

**Table S5: Culture media for hPSC-CM cardiobundles.**

| <b>Component</b>              | <b>3DRB+ media</b> | <b>5% FBS media</b>                                  |
|-------------------------------|--------------------|------------------------------------------------------|
| <b>Basal media</b>            | RPMI 1640          | Low glucose DMEM<br>(Thermo 11885 or<br>Sigma D6046) |
| <b>FBS</b>                    | --                 | 5 %                                                  |
| <b>ACA</b>                    | 2 mg/mL            | 2 mg/mL                                              |
| <b>AA 2-P SSH</b>             | 50 µg/mL           | 50 µg/mL                                             |
| <b>1-thioglycerol</b>         | 0.45 µM            | 0.45 µM                                              |
| <b>Sodium Pyruvate (100x)</b> | 1%                 | -- *                                                 |
| <b>NEAA (100x)</b>            | 1%                 | 1%                                                   |
| <b>Pen Strep (100x)</b>       | 1%                 | 1%                                                   |
| <b>B27 supplement (50x)</b>   | 2%                 | --                                                   |

FBS: Fetal Bovine Serum

ACA: Aminocaproic Acid

AA 2-P SSH: Ascorbic Acid 2-phosphate sesquimagnesium salt hydrate

NEAA: Non-essential amino acids

\* included in basal media

**Table S6: Effects of dynamic culture and phenylephrine on NRVM cardiobundles, compared with changes during postnatal cardiac development and pathological hypertrophy of the adult heart.**

| <b>Parameter</b>           | <b>Dynamic Culture</b> | <b>Phenylephrine</b> | <b>Postnatal Development</b> | <b>Pathological Hypertrophy</b> |
|----------------------------|------------------------|----------------------|------------------------------|---------------------------------|
| <b>Active force</b>        | ↑                      | ↔                    | ↑<br>[15]                    | ↓<br>[16, 17]                   |
| <b>Passive force</b>       | ↔ or ↑                 | ↑                    | ↑<br>[18, 19]                | ↑<br>[20]                       |
| <b>Twitch kinetics</b>     | ↔                      | ↓                    | ↑<br>[21]                    | ↓<br>[16, 22]                   |
| <b>CV</b>                  | ↑                      | ↓                    | ↑<br>[1, 23]                 | ↓, ↔, or ↑<br>[24]              |
| <b>APD</b>                 | ↔                      | ↑                    | ↓<br>[25, 26]                | ↑<br>[27, 28]                   |
| <b>CM size</b>             | ↑                      | ↑                    | ↑<br>[29, 30]                | ↑<br>[16, 17]                   |
| <b>α-skeletal actin</b>    | ↑                      | ↑                    | ↑ then ↓<br>[31, 32]         | ↑<br>[16, 17]                   |
| <b>Na<sub>v</sub>1.5</b>   | ↑                      | ↔                    | ↑<br>[33, 34]                | ↔ or ↓<br>[35, 36]              |
| <b>SERCA-2a</b>            | ↑                      | ↓                    | ↑<br>[37]                    | ↓<br>[17, 38]                   |
| <b>α-MHC</b>               | ↑                      | ↓                    | ↑<br>[39]                    | ↔ or ↓<br>[16, 17]              |
| <b>β-MHC / α-MHC ratio</b> | ↔                      | ↑                    | ↓<br>[39, 40]                | ↑<br>[16, 17]                   |

## Supplemental References

- [1] Bursac N, Papadaki M, Cohen RJ, Schoen FJ, Eisenberg SR, Carrier R, et al. Cardiac muscle tissue engineering: Toward an in vitro model for electrophysiological studies. *American Journal of Physiology - Heart and Circulatory Physiology*. 1999;277:H433-H44.
- [2] Ludwig TE, Bergendahl V, Levenstein ME, Yu J, Probasco MD, Thomson JA. Feeder-independent culture of human embryonic stem cells. *Nat Meth*. 2006;3:637-46.
- [3] Chen G, Gulbranson DR, Hou Z, Bolin JM, Ruotti V, Probasco MD, et al. Chemically defined conditions for human ipsc derivation and culture. *Nat Methods*. 2011;8:424-9.
- [4] Lian X, Hsiao C, Wilson G, Zhu K, Hazeltine LB, Azarin SM, et al. Robust cardiomyocyte differentiation from human pluripotent stem cells via temporal modulation of canonical wnt signaling. *Proc Natl Acad Sci U S A*. 2012;109:1848-57.
- [5] Sharma A, Li G, Rajarajan K, Hamaguchi R, Burridge PW, Wu SM. Derivation of highly purified cardiomyocytes from human induced pluripotent stem cells using small molecule-modulated differentiation and subsequent glucose starvation. *JOVE*. 2015:e52628.
- [6] Tohyama S, Hattori F, Sano M, Hishiki T, Nagahata Y, Matsuura T, et al. Distinct metabolic flow enables large-scale purification of mouse and human pluripotent stem cell-derived cardiomyocytes. *Cell Stem Cell*. 2013;12:127-37.
- [7] Burridge PW, Matsa E, Shukla P, Lin ZC, Churko JM, Ebert AD, et al. Chemically defined generation of human cardiomyocytes. *Nat Methods*. 2014;11:855-60.
- [8] Juhas M, Bursac N. Roles of adherent myogenic cells and dynamic culture in engineered muscle function and maintenance of satellite cells. *Biomaterials*. 2014;35:9438-46.
- [9] Williams C, Johnson SL, Robinson PS, Tranquillo RT. Cell sourcing and culture conditions for fibrin-based valve constructs. *Tissue engineering*. 2006;12:1489-502.
- [10] McSpadden LC, Kirkton RD, Bursac N. Electrotonic loading of anisotropic cardiac monolayers by unexcitable cells depends on connexin type and expression level. *Am J Physiol-Cell Physiol*. 2009;297:C339-C51.
- [11] Bian W, Jackman CP, Bursac N. Controlling the structural and functional anisotropy of engineered cardiac tissues. *Biofabrication*. 2014;6:024109.
- [12] Hinds S, Bian W, Dennis RG, Bursac N. The role of extracellular matrix composition in structure and function of bioengineered skeletal muscle. *Biomaterials*. 2011;32:3575-83.
- [13] Madden L, Juhas M, Kraus WE, Truskey GA, Bursac N. Bioengineered human myobundles mimic clinical responses of skeletal muscle to drugs. *eLife*. 2015;4:e04885.
- [14] Bian W, Bursac N. Soluble miniagrin enhances contractile function of engineered skeletal muscle. *The FASEB Journal*. 2012;26:955-65.
- [15] Solaro RJ, Lee JA, Kentish JC, Allen DG. Effects of acidosis on ventricular muscle from adult and neonatal rats. *Circulation Research*. 1988;63:779-87.
- [16] Hirt MN, Sørensen NA, Bartholdt LM, Boeddinghaus J, Schaaf S, Eder A, et al. Increased afterload induces pathological cardiac hypertrophy: A new in vitro model. *Basic Res Cardiol*. 2012;107:1-16.
- [17] McMullen JR, Jennings GL. Differences between pathological and physiological cardiac hypertrophy: Novel therapeutic strategies to treat heart failure. *Clinical and Experimental Pharmacology and Physiology*. 2007;34:255-62.
- [18] Warren CM, Krzesinski PR, Campbell KS, Moss RL, Greaser ML. Titin isoform changes in rat myocardium during development. *Mechanisms of Development*. 2004;121:1301-12.
- [19] Hopkins SF, McCutcheon EP, Wekstein DR. Postnatal changes in rat ventricular function. *Circulation Research*. 1973;32:685-91.
- [20] Doering CW, Jalil JE, Janicki JS, Pick R, Aghili S, Abrahams C, et al. Collagen network remodelling and diastolic stiffness of the rat left ventricle with pressure overload hypertrophy. *Cardiovascular Research*. 1988;22:686.

- [21] Kuznetsov V, Pak E, Robinson RB, Steinberg SF. B2-adrenergic receptor actions in neonatal and adult rat ventricular myocytes. *Circulation Research*. 1995;76:40-52.
- [22] Varian KD, Kijawornrat A, Gupta SC, Torres CAA, Monasky MM, Hiranandani N, et al. Impairment of diastolic function by lack of frequency-dependent myofilament desensitization in rabbit right ventricular hypertrophy. *Circulation: Heart Failure*. 2009;2:472-81.
- [23] Spach MS, Heidlage JF, Dolber PC, Barr RC. Changes in anisotropic conduction caused by remodeling cell size and the cellular distribution of gap junctions and na(+) channels. *Journal of Electrocardiology*. 2001;34 Suppl:69-76.
- [24] Wiegerinck RF, Verkerk AO, Belterman CN, van Veen TAB, Baartscheer A, Opthof T, et al. Larger cell size in rabbits with heart failure increases myocardial conduction velocity and qrs duration. *Circulation*. 2006;113:806.
- [25] Wickenden AD, Kaprielian R, Parker TG, Jones OT, Backx PH. Effects of development and thyroid hormone on k<sup>+</sup> currents and k<sup>+</sup> channel gene expression in rat ventricle. *The Journal of Physiology*. 1997;504:271-86.
- [26] Liu W-j, Deng J-x, Wang G, Gao K-p, Lin Z-x, Liu S-y, et al. Manipulation of kcne2 expression modulates action potential duration and i<sub>to</sub> and i<sub>k</sub> in rat and mouse ventricular myocytes. *American Journal of Physiology - Heart and Circulatory Physiology*. 2015;309:H1288-H302.
- [27] Lebeche D, Kaprielian R, Hajjar R. Modulation of action potential duration on myocyte hypertrophic pathways. *Journal of Molecular and Cellular Cardiology*. 2006;40:725-35.
- [28] Tao W, Shi J, Dorn II GW, Wei L, Rubart M. Spatial variability in t-tubule and electrical remodeling of left ventricular epicardium in mouse hearts with transgenic gaq overexpression-induced pathological hypertrophy. *Journal of Molecular and Cellular Cardiology*. 2012;53:409-19.
- [29] Lasher RA, Pahnke AQ, Johnson JM, Sachse FB, Hitchcock RW. Electrical stimulation directs engineered cardiac tissue to an age-matched native phenotype. *Journal of tissue engineering*. 2012;3:2041731412455354-15.
- [30] Tiburcy M, Didié M, Boy O, Christalla P, Döker S, Naito H, et al. Terminal differentiation, advanced organotypic maturation, and modeling of hypertrophic growth in engineered heart tissue. *Circulation Research*. 2011;109:1105-14.
- [31] Collins T, Joya JE, Arkell RM, Ferguson V, Hardeman EC. Reappearance of the minor  $\alpha$ -sarcomeric actins in postnatal muscle. *American Journal of Physiology - Cell Physiology*. 1997;273:C1801.
- [32] Carrier L, Boheler KR, Chassagne C, de la Bastie D, Wisnewsky C, Lakatta EG, et al. Expression of the sarcomeric actin isogenes in the rat heart with development and senescence. *Circulation Research*. 1992;70:999-1005.
- [33] Krause U, Alflen C, Steinmetz M, Müller MJ, Quentin T, Paul T. Characterization of maturation of neuronal voltage-gated sodium channels scn1a and scn8a in rat myocardium. *Molecular and Cellular Pediatrics*. 2015;2:5.
- [34] Harrell MD, Harbi S, Hoffman JF, Zavadil J, Coetzee WA. Large-scale analysis of ion channel gene expression in the mouse heart during perinatal development. *Physiological Genomics*. 2007;28:273-83.
- [35] Bierhuizen MFA, Boulaksil M, van Stuijvenberg L, van der Nagel R, Jansen AT, Mutsaers NAM, et al. In calcineurin-induced cardiac hypertrophy expression of nav1.5, cx40 and cx43 is reduced by different mechanisms. *Journal of Molecular and Cellular Cardiology*. 45:373-84.
- [36] Fontes MSC, Raaijmakers AJA, van Doorn T, Kok B, Nieuwenhuis S, van der Nagel R, et al. Changes in cx43 and nav1.5 expression precede the occurrence of substantial fibrosis in calcineurin-induced murine cardiac hypertrophy. *PLoS ONE*. 2014;9:e87226.
- [37] Ribadeau-Dumas A, Brady M, Boateng SY, Schwartz K, Boheler KR. Sarco(endo)plasmic reticulum ca<sup>2+</sup>-atpase (serca2) gene products are regulated post-transcriptionally during rat cardiac development. *Cardiovascular Research*. 1999;43:426-36.

- [38] Periasamy M, Bhupathy P, Babu GJ. Regulation of sarcoplasmic reticulum  $Ca^{2+}$  ATPase pump expression and its relevance to cardiac muscle physiology and pathology. *Cardiovascular Research*. 2008;77:265.
- [39] Haddad F, Qin AX, Bodell PW, Jiang W, Giger JM, Baldwin KM. Intergenic transcription and developmental regulation of cardiac myosin heavy chain genes. *American Journal of Physiology - Heart and Circulatory Physiology*. 2008;294:H29.
- [40] Lompré AM, Nadal-Ginard B, Mahdavi V. Expression of the cardiac ventricular alpha- and beta-myosin heavy chain genes is developmentally and hormonally regulated. *Journal of Biological Chemistry*. 1984;259:6437-46.
